# Supplementary material for: Examining the role of common and rare mitochondrial variants in schizophrenia
Source: PLoS One. 2018 Jan 25;13(1):e0191153. doi: 10.1371/journal.pone.0191153 (PMC5784966; doi:10.1371/journal.pone.0191153)
Supplement: S2 Table — (XLSX) [file pone.0191153.s005.xlsx]

## Sheet: data
Haplogroup	Number	%
A2a4	2	0.019687
B2b3a	1	0.00984349
B2i1	1	0.00984349
B2y1	1	0.00984349
B4b1a2a	8	0.0787479
B4b1a2h	6	0.0590609
B4b1a3	1	0.00984349
B4c1b2a2	1	0.00984349
B4c2b	7	0.0689044
B4m	3	0.0295305
B5a2a2a1	3	0.0295305
B6a1a	1	0.00984349
C1c6	1	0.00984349
D4h1a1	1	0.00984349
D4j6	2	0.019687
F1a'c'f	1	0.00984349
F1b1	1	0.00984349
F2c	2	0.019687
F3a1	2	0.019687
H	770	7.57949
H+13708	10	0.0984349
H1	1317	12.9639
H10a	10	0.0984349
H10e3a	51	0.502018
H11	41	0.403583
H13	69	0.679201
H13a	31	0.305148
H13a1a1d	2	0.019687
H13a2b2	1	0.00984349
H13b1	1	0.00984349
H14b	1	0.00984349
H17	83	0.81701
H18b	2	0.019687
H1aa1	33	0.324835
H1ag1b	3	0.0295305
H1aj	7	0.0689044
H1b1e	4	0.039374
H1b2	14	0.137809
H1bh	5	0.0492174
H1c1	132	1.29934
H1c14	13	0.127965
H1c1a	1	0.00984349
H1c3	46	0.4528
H1c4	25	0.246087
H1e	127	1.25012
H1j	117	1.15169
H1j6	1	0.00984349
H1n1b	3	0.0295305
H2	74	0.728418
H20b	1	0.00984349
H21	4	0.039374
H24b	16	0.157496
H27	43	0.42327
H28a2	2	0.019687
H2a	14	0.137809
H2a1	143	1.40762
H2a1d	117	1.15169
H2a2	16	0.157496
H2a2b5a	1	0.00984349
H2a5	17	0.167339
H2c	3	0.0295305
H3	329	3.23851
H30b1	17	0.167339
H35a	89	0.87607
H3au	2	0.019687
H3b1	2	0.019687
H3b7	2	0.019687
H3g1	77	0.757949
H3h3b	40	0.39374
H3r	20	0.19687
H3s	3	0.0295305
H3w	2	0.019687
H3x1	8	0.0787479
H4	18	0.177183
H41a	11	0.108278
H4a	11	0.108278
H4a1	1	0.00984349
H5+709	36	0.354366
H53	58	0.570922
H5a	85	0.836697
H5a1	56	0.551235
H5a1b	4	0.039374
H5a1c1	1	0.00984349
H5a1f	1	0.00984349
H5a3a1	43	0.42327
H5b	27	0.265774
H5u1	23	0.2264
H65	1	0.00984349
H65a	4	0.039374
H69	6	0.0590609
H6a	14	0.137809
H6a1	5	0.0492174
H6a1a	17	0.167339
H6a1a7	1	0.00984349
H6a1b2	1	0.00984349
H6a1b2e	1	0.00984349
H7	102	1.00404
H7a	4	0.039374
H7d5	2	0.019687
H84	3	0.0295305
HV	111	1.09263
HV0a	109	1.07294
HV1a'b'c	8	0.0787479
HV1d	2	0.019687
HV5	12	0.118122
HV9	3	0.0295305
I	100	0.984349
I1	47	0.462644
I1a	32	0.314992
I2	66	0.64967
I5	10	0.0984349
I5a1a	1	0.00984349
I6a	1	0.00984349
J1	72	0.708731
J1b	5	0.0492174
J1b1	19	0.187026
J1c	349	3.43538
J1c1	86	0.84654
J1c1b1a	3	0.0295305
J1c2a3	7	0.0689044
J1c2e2	3	0.0295305
J1c2f	5	0.0492174
J1c3	98	0.964662
J1c3c	4	0.039374
J1c3d	7	0.0689044
J1c5c1	6	0.0590609
J1c5f	7	0.0689044
J1c8	10	0.0984349
J1d	3	0.0295305
J2	123	1.21075
J2a	41	0.403583
J2a1	25	0.246087
J2a1a	24	0.236244
J2a1a1	13	0.127965
J2a1a1a2	7	0.0689044
J2a1a1b	1	0.00984349
J2a2d	1	0.00984349
L1'2'3'4'5'6	1	0.00984349
L1c2a	2	0.019687
L2c	1	0.00984349
L2c2a	1	0.00984349
L3	8	0.0787479
L3a+709	2	0.019687
L3c'd	4	0.039374
L3d1a1a	1	0.00984349
L3d1b	2	0.019687
L3e1	1	0.00984349
L3e1f2	1	0.00984349
L3f1b4	1	0.00984349
L4	1	0.00984349
L4b	1	0.00984349
L4b2a1	1	0.00984349
L5b	4	0.039374
M	3	0.0295305
M12	1	0.00984349
M1a3	1	0.00984349
M1b2a	1	0.00984349
M37a1	1	0.00984349
M3a	4	0.039374
M43	1	0.00984349
M71a2	1	0.00984349
M7b1	1	0.00984349
N	1	0.00984349
N1	2	0.019687
N10	1	0.00984349
N1'5	28	0.275618
N1a	10	0.0984349
N1a1	8	0.0787479
N1a1b	11	0.108278
N1b	3	0.0295305
N2	3	0.0295305
N21	6	0.0590609
N8	3	0.0295305
N9a	2	0.019687
N9b	1	0.00984349
O1	2	0.019687
R	2	0.019687
R0	17	0.167339
R0a2e	2	0.019687
R0a2f	1	0.00984349
R11	1	0.00984349
R1a	4	0.039374
R2'JT	2	0.019687
R7	1	0.00984349
S1a	3	0.0295305
T	39	0.383896
T1a1	38	0.374053
T1a1e	1	0.00984349
T1a1k1	3	0.0295305
T1a5	1	0.00984349
T1a8a	1	0.00984349
T1b2	9	0.0885914
T2	234	2.30338
T2a1b1	10	0.0984349
T2b	185	1.82105
T2b24a	36	0.354366
T2b25	6	0.0590609
T2b28	6	0.0590609
T2b36	10	0.0984349
T2b3a	10	0.0984349
T2b3b	10	0.0984349
T2b4	43	0.42327
T2b4c	1	0.00984349
T2c1a1	9	0.0885914
T2c1c1	2	0.019687
T2c1d2	9	0.0885914
T2d1	9	0.0885914
T2d2	1	0.00984349
T2f1a	5	0.0492174
T2g	10	0.0984349
T2h1	4	0.039374
T2i2	144	1.41746
U	45	0.442957
U2'3'4'7'8'9	73	0.718575
U2a2	24	0.236244
U2d	3	0.0295305
U2e	28	0.275618
U2e1a1a	4	0.039374
U2e2	4	0.039374
U3a1	44	0.433113
U3a1a	2	0.019687
U4	96	0.944975
U4'9	46	0.4528
U4a	50	0.492174
U4a1a	7	0.0689044
U4a2a2	5	0.0492174
U4a2c1	40	0.39374
U4a2f	6	0.0590609
U4b1a2	6	0.0590609
U4b1a2b	45	0.442957
U4b1a3	3	0.0295305
U4b1b1b	9	0.0885914
U4d2	3	0.0295305
U5a	100	0.984349
U5a1	191	1.88011
U5a1a	86	0.84654
U5a1a1	33	0.324835
U5a1a2b	2	0.019687
U5a1a2b1	1	0.00984349
U5a1b	89	0.87607
U5a1b1c	1	0.00984349
U5a1c2	8	0.0787479
U5a1f1a	2	0.019687
U5a1f2	2	0.019687
U5a1g1	7	0.0689044
U5a1h	17	0.167339
U5a2b4	2	0.019687
U5a'b	1	0.00984349
U5b	210	2.06713
U5b1	127	1.25012
U5b1b	90	0.885914
U5b2	153	1.50605
U5b2a1a2	2	0.019687
U5b2a4	1	0.00984349
U5b2a5a	3	0.0295305
U5b3e	1	0.00984349
U5b3g	2	0.019687
U6	26	0.255931
U6a	14	0.137809
U6a7	2	0.019687
U6a7a	1	0.00984349
U6a7c1	6	0.0590609
U7a3	2	0.019687
U8	67	0.659514
U8a2	1	0.00984349
U8b	26	0.255931
U8b1a1	5	0.0492174
U8b1b	1	0.00984349
U8b'c	24	0.236244
U8b'K	833	8.19963
U8c	3	0.0295305
V	214	2.10651
V13	2	0.019687
V2	12	0.118122
V22	10	0.0984349
V23	4	0.039374
V2a1	3	0.0295305
V9a	5	0.0492174
W	67	0.659514
W1	51	0.502018
W1a	20	0.19687
W1e1a	4	0.039374
W3a	4	0.039374
W3a1d	4	0.039374
W4c	30	0.295305
X2	44	0.433113
X2b6	5	0.0492174
X2b7	7	0.0689044
X2b'd	24	0.236244
X2f1	1	0.00984349
Y2	1	0.00984349
Z	1	0.00984349
Z4a1a1	1	0.00984349
	10159

## Sheet: Sheet1
Haplogroup
H1
U5a
T2
H
I
W3a1d
U5b
J2
K1
H3
J1c
HV0a
H2a1
K1b2b
T2i2
U2a2
H1e
H1c1
U
U5a1
H3h3b
N21
T2b24a
U5b2
U4
J2a1
V
U8b
X2
U5a1b
H27
U4b1a3
W4c
HV
H7
J1
V13
J1c1
W
U5a1a1
H17
K1a4
W1
K1a4a1i
H2
J1c5f
U5b1
J1b1
U5a1a
U5b1b
I1
T
H1c3
N1
H1j
H10e3a
H2a1d
B4m
L2c2a
T2b
J1c2a3
HV9
H35a
I1a
H5+709
U3a1
U2'3'4'7'8'9
U4b1a2b
K1a4a1
H11
U8b'c
L1c2a
U8
H6a1a7
R
K1a4a1d
H1c4
K1c1
T2h1
T2b4
J2a1a
K
I2
U5a1c2
H5a
H13
H4
L3c'd
K1a1
H1aa1
H3g1
J1c3
H5a1
J2a1a1
H18b
T2b28
B4b1a2a
U4'9
T1a1
H2a
U4a2c1
R0
T2d1
M12
T2c1a1
H13a
H5b
U8c
A2a4
U5a1g1
HV1a'b'c
U6a
H53
V9a
H5u1
J2a1a1a2
J2a
H41a
H2a5
U4a
H6a1a
W1a
H4a
N1'5
J1c8
K1b1a
H2a2
T2b36
H5a3a1
H24b
L3f1b4
L3
H+13708
Z
N8
H1c14
L5b
K1a4a
J1c3c
T2b25
K2a
U4b1b1b
U8b1a1
H3r
M
X2b'd
H6a1b2e
U6a7c1
U4b1a2
H30b1
N9a
U2e
H21
T2b3a
H69
U6
M3a
U4d2
U5a1h
T2a1b1
K1a1b
U4a2f
J1c2f
H5a1b
T2f1a
U4a1a
T2c1d2
N1a1
H20b
L4b2a1
U7a3
V2a1
M43
N1a1b
B4c2b
K2a11
H10a
U5a1f1a
V23
H13a2b2
U5a2b4
W1e1a
H1ag1b
S1a
H7a
T2b4c
J1c2e2
U5b2a5a
B4b1a2h
H6a
K1e
K1a17
T1b2
H1b2
N1a
H7d5
T2g
J1c5c1
U5b3e
H1aj
HV5
H3b1
R0a2f
K1c1h
H1bh
N10
X2b7
K1a2c
F2c
U3a1a
J1c3d
T2b3b
U5a'b
T1a5
K1a4g
K2a2
U4a2a2
U2e1a1a
U2e2
K1a1c
HV1d
T1a1k1
J1d
H6a1
X2b6
O1
H13b1
U5b2a1a2
T1a1e
J1c1b1a
R0a2e
H3x1
F3a1
N1b
K1b2a1
B2i1
H84
U2d
V2
K1b2a2
J1b
U5b3g
H1j6
W3a
H65
V22
B4b1a3
M37a1
H65a
U6a7
D4j6
K1a1b2a1
R1a
C1c6
B2b3a
I5
T2c1c1
H1b1e
N
N2
B5a2a2a1
H6a1b2
H14b
H1c1a
L3a+709
H3b7
J2a2d
M1a3
I5a1a
J2a1a1b
D4h1a1
L3e1
R2'JT
U8a2
H1n1b
H13a1a1d
M7b1
L3d1a1a
F1a'c'f
H28a2
H2c
U8b1b
L3d1b
H4a1
H3w
B4c1b2a2
H5a1f
B6a1a
U5a1a2b1
U5a1a2b
U5a1f2
H3s
T2d2
N9b
H5a1c1
H3au
M71a2
L3e1f2
U5b2a4
L4
T1a8a
I6a
K2a2a1
L4b
Y2
F1b1
L1'2'3'4'5'6
R7
U6a7a
U5a1b1c
X2f1
H2a2b5a
Z4a1a1
L2c
R11
M1b2a
B2y1

## Sheet: Sheet2
U8b'K	273
U8b'K	115
U8b'K	167
U8b'K	56
U8b'K	55
U8b'K	29
U8b'K	26
U8b'K	24
U8b'K	15
U8b'K	11
U8b'K	11
U8b'K	9
U8b'K	7
U8b'K	6
U8b'K	5
U8b'K	4
U8b'K	4
U8b'K	4
U8b'K	3
U8b'K	2
U8b'K	2
U8b'K	2
U8b'K	1
U8b'K	1
U8b'K	1
	833
